# Supplementary material for: An amphiphilic catalyst based on sandwich-type polyoxometalate for deep desulfurization of fuels in ionic liquid
Source: Royal Society of Chemistry journal article supplement (doi:10.1039/c6ra09645j), 2016-01-01
Supplement: c6ra09645j1.pdf [file c6ra09645j1.pdf]

## Supporting Materials

An amphiphilic catalyst based on sandwich-type polyoxometalate for  
deep desulfurization of fuels in ionic liquid

Yan Xu, Wen-Wen Ma, Arouna Dolo, Hong Zhang\*

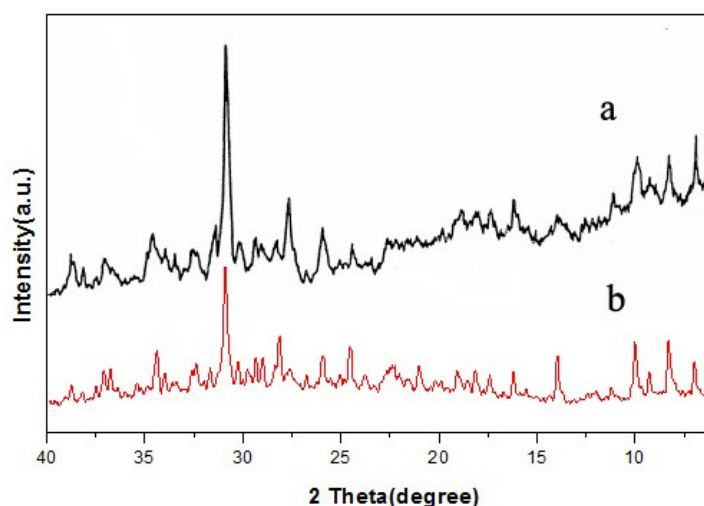

**Fig. S1** XRD pattern of  $\text{Co}_4(\text{PW}_9)_2$ : (a) prepared by Weakley's method (b) prepared by literature [32].

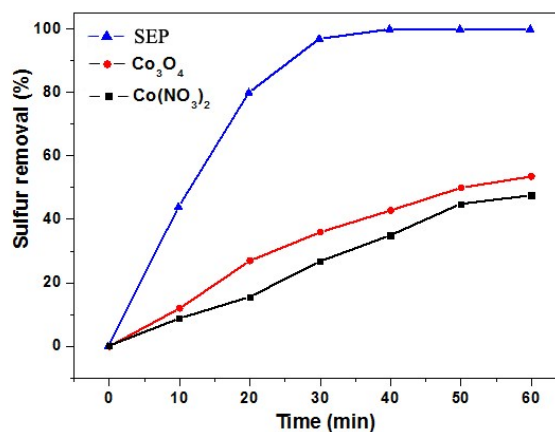

**Fig. S2** The conversion of DBT with different catalysts  $\text{Co}_3\text{O}_4$ ,  $\text{Co}(\text{NO}_3)_2$  and SEP.  
Reaction conditions: Model oil (S in n-octane = 500 ppm) 5 ml,  $[\text{Bmim}]\text{PF}_6 = 1$  mL,  $t = 60$  min,  $T = 60^\circ\text{C}$ ,  $O/S = 4$ ,  $n(\text{sulfur})/n(\text{catalyst}) = 20:1$ .
